# Supplementary material
Source: MDPI journal article supplement (https://www.mdpi.com/2076-3417/13/2/1042)
Supplement: s1 [file s1]

*Supplementary materials*

# Heavy metal exposures on freshwater snail *Pomacea insularum*: Understanding its biomonitoring potentials

Chee Kong Yap <sup>1,\*</sup>, Bin Huan Pang <sup>1</sup>, Wan Hee Cheng <sup>2</sup>, Krishnan Kumar <sup>2</sup>, Ram Avtar <sup>3</sup>, Hideo Okamura <sup>4</sup>, Yoshifumi Horie <sup>4</sup>, Moslem Sharifinia <sup>5</sup>, Mehrzad Keshavarzifard <sup>5</sup>, Meng Chuan Ong <sup>6,7</sup>, Abolfazl Naji <sup>8,9</sup>, Mohamad Saupi Ismail <sup>10</sup> and Wen Siang Tan <sup>11,12</sup>

<sup>1</sup> Department of Biology, Faculty of Science, Universiti Putra Malaysia, 43400 UPM Serdang, Selangor, Malaysia

<sup>2</sup> Faculty of Health and Life Sciences, INTI International University, Persiaran Perdana BBN, Nilai 71800, Negeri Sembilan, Malaysia

<sup>3</sup> Graduate School of Environmental Science, Hokkaido University, Sapporo, Hokkaido 060-0810, Japan

<sup>4</sup> Graduate School of Maritime Sciences, Faculty of Maritime Sciences, Kobe University, Kobe 658-0022, Japan

<sup>5</sup> Shrimp Research Center, Iranian Fisheries Science Research Institute, Agricultural Research, Education and Extension Organization (AREEO), Bushehr 7516989177, Iran

<sup>6</sup> Faculty of Science and Marine Environment, Universiti Malaysia Terengganu, Kuala Nerus 21030, Terengganu, Malaysia

<sup>7</sup> Ocean Pollution and Ecotoxicology (OPEC) Research Group, Universiti Malaysia Terengganu, Kuala Nerus 21030, Terengganu, Malaysia

<sup>8</sup> Department of Fisheries, Faculty of Marine Science and Technology, University of Hormozgan, Bandar Abbas, 7C9Q+QC3, Iran

<sup>9</sup> Leibniz Centre for Tropical Marine Research (ZMT), Wiener Str. 7, 28359 Bremen, Germany

<sup>10</sup> Fisheries Research Institute, Batu Maung, Pulau Pinang 11960, Malaysia

<sup>11</sup> Laboratory of Vaccines and Biomolecules, Institute of Bioscience, Universiti Putra Malaysia, 43400 UPM Serdang, Selangor, Malaysia

<sup>12</sup> Department of Microbiology, Faculty of Biotechnology and Biomolecular Sciences, Universiti Putra Malaysia, 43400 UPM Serdang, Selangor, Malaysia

\* Correspondence: yapckong@hotmail.com or yapchee@upm.edu.my

Table S1: Nominal and measured concentrations (mg/L) of Ni, Cd and Cu in the toxicity test for the *Pomacea insularum* of two different sized groups (Shell lengths, small 0.50-0.70cm; large: shell 1.50-2.20cm).

|    | Small   |          | Large   |          |
|----|---------|----------|---------|----------|
|    | Nominal | Measured | Nominal | Measured |
| Cd | Control | 0.010    | Control | 0.010    |
|    | 1.000   | 0.978    | 1.000   | 1.001    |
|    | 2.000   | 1.935    | 5.000   | 4.982    |
|    | 3.000   | 2.816    | 10.000  | 9.801    |
|    | 4.000   | 3.819    | 15.000  | 14.82    |
|    | 5.000   | 4.853    | 20.000  | 19.98    |
|    |         |          |         |          |
| Cu | Control | 0.010    | Control | 0.010    |
|    | 1.000   | 1.013    | 1.000   | 0.965    |
|    | 1.500   | 1.503    | 2.000   | 1.989    |
|    | 2.000   | 1.945    | 3.000   | 3.056    |
|    | 2.500   | 2.466    | 4.000   | 3.976    |
|    | 3.000   | 3.013    | 5.000   | 4.912    |
|    |         |          |         |          |
| Ni | Control | 0.010    | Control | 0.010    |
|    | 1.000   | 1.034    | 1.000   | 0.979    |
|    | 4.000   | 4.072    | 5.000   | 4.789    |
|    | 8.000   | 7.901    | 10.000  | 9.920    |
|    | 12.000  | 11.49    | 15.000  | 14.31    |
|    | 16.000  | 15.13    | 20.000  | 19.14    |
|    |         |          |         |          |
| Pb | Control | 0.010    | Control | 0.010    |
|    | 1.000   | 1.054    | 1.000   | 0.987    |
|    | 5.000   | 4.896    | 5.000   | 4.995    |
|    | 10.000  | 9.991    | 10.000  | 10.01    |
|    | 15.000  | 14.89    | 15.000  | 14.87    |
|    | 20.000  | 19.98    | 20.000  | 19.58    |
|    |         |          |         |          |
| Zn | Control | 0.010    | Control | 0.010    |
|    | 1.000   | 1.011    | 1.000   | 0.936    |
|    | 5.000   | 4.857    | 5.000   | 4.977    |
|    | 10.000  | 9.889    | 10.000  | 9.890    |
|    | 25.000  | 24.71    | 30.000  | 29.32    |
|    | 50.000  | 50.12    | 60.000  | 59.16    |
|    |         |          |         |          |

Table S2: Mortality of individuals (*Pomacea insularum*) for the small sized group (Shell length: 0.50-0.70 cm) collected after four different periods of exposure to a series of different concentrations of Pb, Ni, Cd, Zn and Cu.

|                 | Number of dead individuals |        |        |        |
|-----------------|----------------------------|--------|--------|--------|
| Cd              | 24 hrs                     | 48 hrs | 72 hrs | 96 hrs |
| Control (0.010) | 0                          | 0      | 0      | 0      |
| 1.000 (0.978)   | 0                          | 2      | 4      | 5      |
| 2.000 (1.935)   | 0                          | 3      | 4      | 6      |
| 3.000 (2.816)   | 0                          | 3      | 6      | 10     |
| 4.000 (3.819)   | 1                          | 5      | 8      | 10     |
| 5.000 (4.853)   | 2                          | 7      | 10     | 10     |
| Cu              | 24 hrs                     | 48 hrs | 72 hrs | 96 hrs |
| Control (0.010) | 0                          | 0      | 0      | 0      |
| 1.000 (1.013)   | 2                          | 6      | 9      | 10     |
| 1.500 (1.503)   | 4                          | 8      | 9      | 10     |
| 2.000 (1.945)   | 5                          | 9      | 10     | 10     |
| 2.500 (2.466)   | 8                          | 9      | 10     | 10     |
| 3.000 (3.013)   | 8                          | 10     | 10     | 10     |
| Ni              | 24 hrs                     | 48 hrs | 72 hrs | 96 hrs |
| Control (0.010) | 0                          | 0      | 0      | 0      |
| 1.000 (1.034)   | 0                          | 3      | 4      | 4      |
| 4.000 (4.072)   | 3                          | 5      | 7      | 9      |
| 8.000 (7.901)   | 5                          | 7      | 8      | 10     |
| 12.000 (11.49)  | 7                          | 9      | 10     | 10     |
| 16.000 (15.13)  | 7                          | 10     | 10     | 10     |
| Zn              | 24 hrs                     | 48 hrs | 72 hrs | 96 hrs |
| Control (0.010) | 0                          | 0      | 0      | 0      |
| 1.000 (1.011)   | 0                          | 0      | 0      | 0      |
| 5.000 (4.857)   | 0                          | 1      | 3      | 4      |
| 10.000 (9.889)  | 0                          | 3      | 7      | 10     |
| 25.000 (24.71)  | 2                          | 4      | 9      | 10     |
| 50.000 (50.12)  | 3                          | 8      | 10     | 10     |
| Pb              | 24 hrs                     | 48 hrs | 72 hrs | 96 hrs |
| Control (0.010) | 0                          | 0      | 0      | 0      |
| 1.000 (1.054)   | 0                          | 1      | 1      | 2      |
| 5.000 (4.896)   | 0                          | 1      | 2      | 3      |
| 10.000 (9.991)  | 2                          | 3      | 7      | 10     |
| 15.000 (14.89)  | 5                          | 8      | 9      | 10     |
| 20.000 (19.98)  | 6                          | 10     | 10     | 10     |

Note: All values in bracket are the measured metal concentrations and presented in mg/L.

Table S3: Mortality of individuals (*Pomacea insularum*) for the large-sized group (Shell length: 1.50-2.20 cm) collected after four different periods of exposure to a series of different concentrations of Ni, Cd and Cu.

|                 | Number of dead individuals |        |        |        |
|-----------------|----------------------------|--------|--------|--------|
| Cd              | 24 hrs                     | 48 hrs | 72 hrs | 96 hrs |
| Control (0.010) | 0                          | 0      | 0      | 0      |
| 1.000 (1.001)   | 0                          | 0      | 0      | 4      |
| 5.000 (4.982)   | 0                          | 2      | 3      | 8      |
| 10.000 (9.801)  | 0                          | 2      | 3      | 10     |
| 15.000 (14.82)  | 0                          | 2      | 6      | 10     |
| 20.000 (19.98)  | 0                          | 4      | 10     | 10     |
| Cu              | 24 hrs                     | 48 hrs | 72 hrs | 96 hrs |
| Control (0.010) | 0                          | 0      | 0      | 0      |
| 1.000 (0.965)   | 0                          | 2      | 7      | 8      |
| 2.000 (1.989)   | 0                          | 5      | 9      | 10     |
| 3.000 (3.056)   | 0                          | 5      | 9      | 10     |
| 4.000 (3.976)   | 0                          | 6      | 10     | 10     |
| 5.000 (4.912)   | 0                          | 7      | 10     | 10     |
| Ni              | 24 hrs                     | 48 hrs | 72 hrs | 96 hrs |
| Control (0.010) | 0                          | 0      | 0      | 0      |
| 1.000 (0.979)   | 0                          | 0      | 0      | 2      |
| 5.000 (4.789)   | 1                          | 2      | 4      | 4      |
| 10.000 (9.920)  | 1                          | 5      | 8      | 8      |
| 15.000 (14.31)  | 4                          | 7      | 10     | 10     |
| 20.000 (19.14)  | 4                          | 9      | 10     | 10     |
| Zn              | 24 hrs                     | 48 hrs | 72 hrs | 96 hrs |
| Control (0.010) | 0                          | 0      | 0      | 0      |
| 1.000 (0.936)   | 0                          | 0      | 0      | 0      |
| 5.000 (4.977)   | 0                          | 0      | 0      | 1      |
| 10.000 (9.890)  | 0                          | 1      | 3      | 3      |
| 30.000 (29.32)  | 1                          | 2      | 5      | 6      |
| 60.000 (59.16)  | 3                          | 5      | 10     | 10     |
| Pb              | 24 hrs                     | 48 hrs | 72 hrs | 96 hrs |
| Control (0.010) | 0                          | 0      | 0      | 0      |
| 1.000 (0.987)   | 0                          | 0      | 0      | 0      |
| 5.000 (4.995)   | 0                          | 1      | 1      | 3      |
| 10.000 (10.01)  | 0                          | 2      | 5      | 8      |
| 15.000 (14.87)  | 2                          | 4      | 7      | 10     |
| 20.000 (19.58)  | 3                          | 6      | 9      | 10     |

Note: All values in the bracket are the measured metal concentrations and presented in mg/L.
